# Supplementary material for: Immediate soft-tissue adhesion and the mechanical properties of the Ti–6Al–4V alloy after long-term acid treatment
Source: Royal Society of Chemistry journal article supplement (doi:10.1039/d1tb00919b), 2021-01-01
Supplement: d1tb00919b1.pdf [file d1tb00919b1.pdf]

Supplementary Information

**Immediate soft-tissue adhesion and mechanical properties of Ti-6Al-4V alloy after long-term acid treatment**

Yaming Wang,<sup>a</sup> Masahiro Okada,<sup>\*a</sup> Shi Chao Xie,<sup>a</sup> Yu Yang Jiao,<sup>a</sup> Emilio Satoshi Hara,<sup>a</sup>  
Hiroaki Yanagimoto,<sup>b</sup> Takumi Fukumoto<sup>b</sup> and Takuya Matsumoto<sup>\*a</sup>

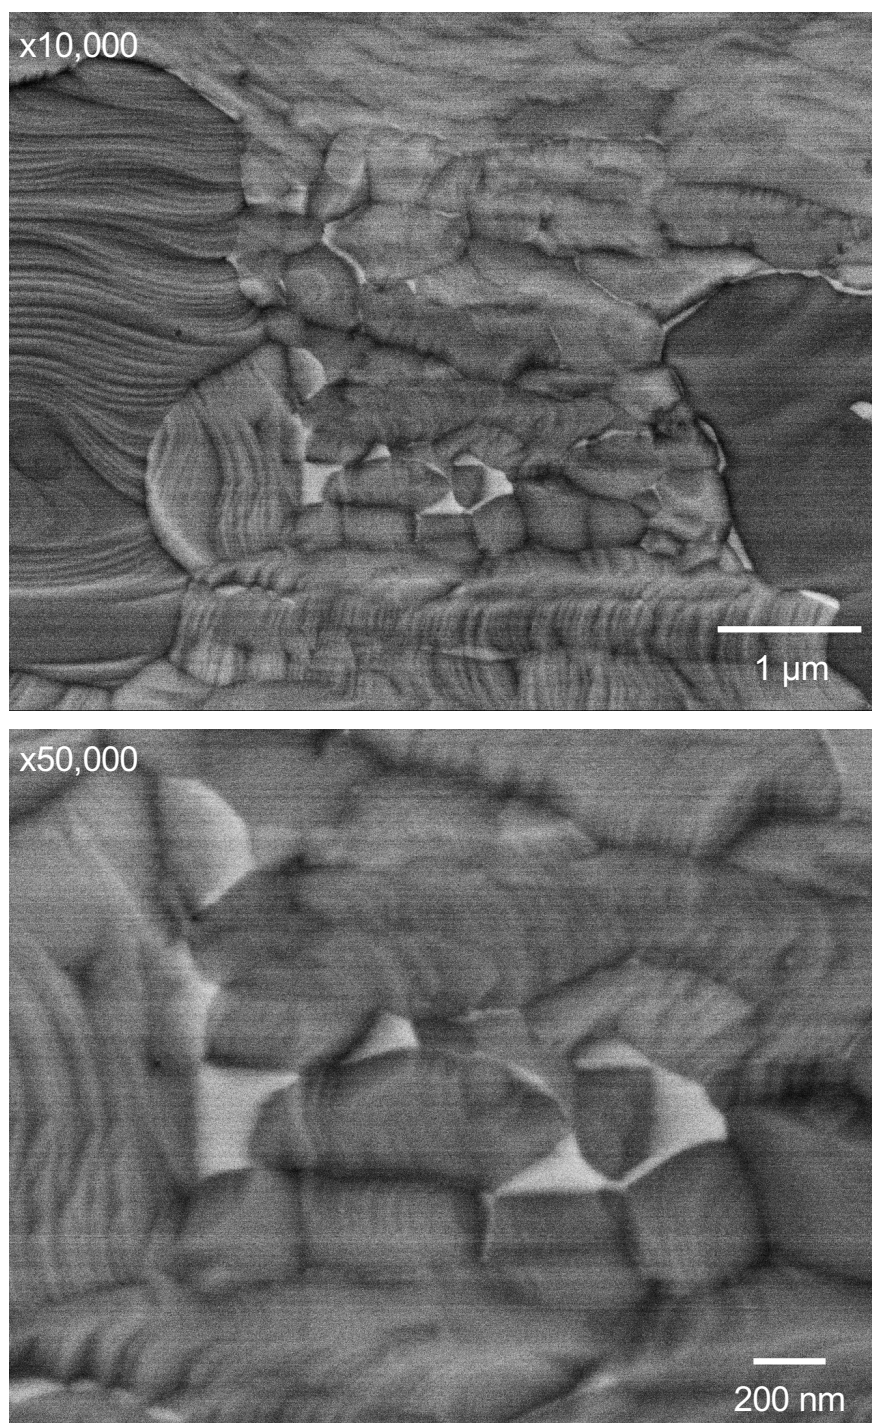

Figure S1. Backscattered electron (BSE) images of the non-treated Ti-6Al-4V film used in this study
